# Supplementary material
Source: PubMed Central journal article supplement (PMC7812827)
Supplement: pnas.2009539118.sapp.pdf [file pnas.2009539118.sapp.pdf]

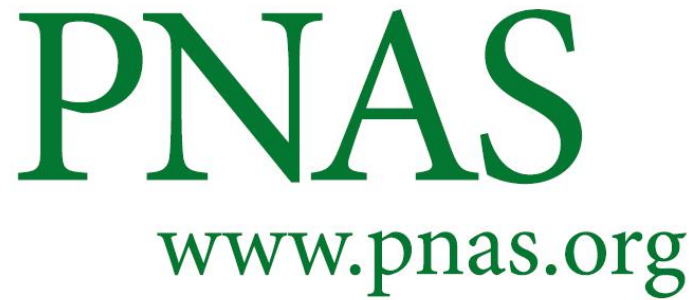

**Supplementary Information for**

**Calcineurin Controls Proximodistal Blastema Polarity in Zebrafish Fin  
Regeneration**

Zigang Cao, Yunlong Meng, Fanghua Gong, Chaopeng Xu, Fasheng Liu, Mengjie

Fang, Lufang Zou, Xinjun Liao, Xinjuan Wang, Lingfei Luo, Xiaokun Li and

Huiqiang Lu

Huiqiang Lu

Email: [luhq2@126.com](mailto:luhq2@126.com)

**This PDF file includes:**

Supplementary text  
Figures S1 to S8  
Tables S1 to S2  
Legend for Movies S1

**Other supplementary materials for this manuscript include the following:**

Movies S1

**Supplementary Figures and Figure legends:**

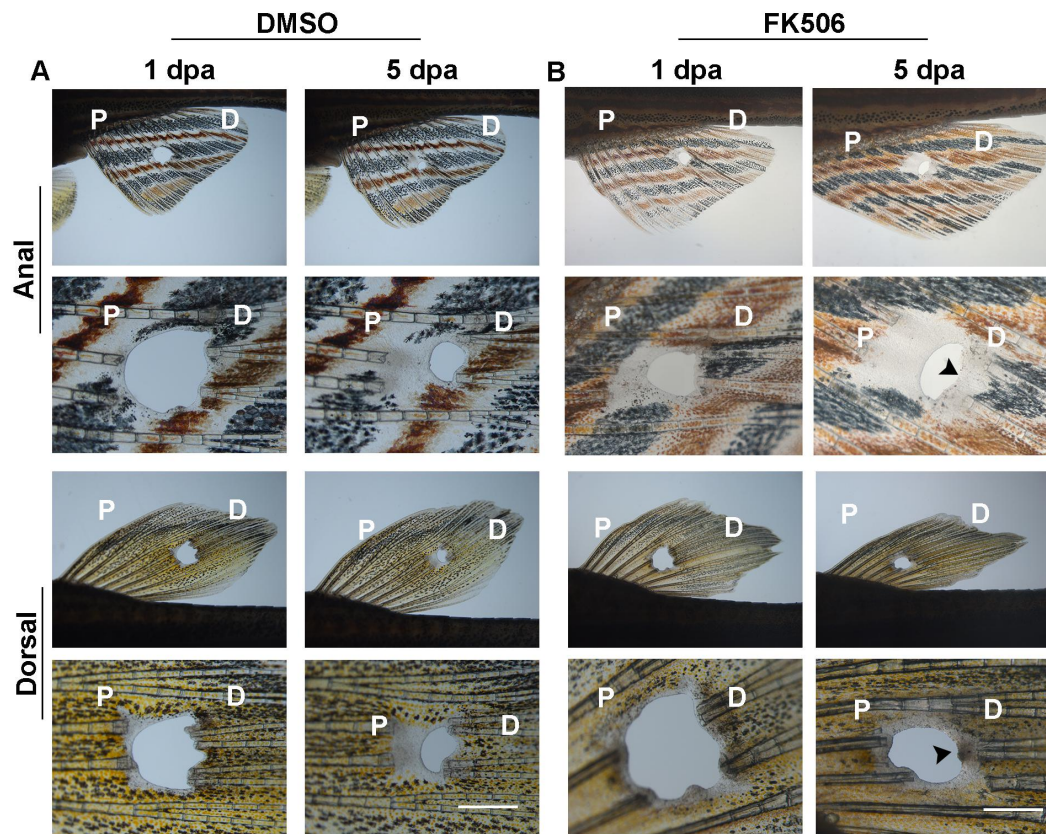

**Fig. S1. PCE blastemas of anal and dorsal fins were induced by the FK506 treatment.** (A) Anal and dorsal PCE fins were amputated and failed to form blastemas (n = 6/6). (B) PCE regeneration of anal and dorsal fins was induced by the FK506 treatment (n = 5/10). Scale bars: 500  $\mu$ M.

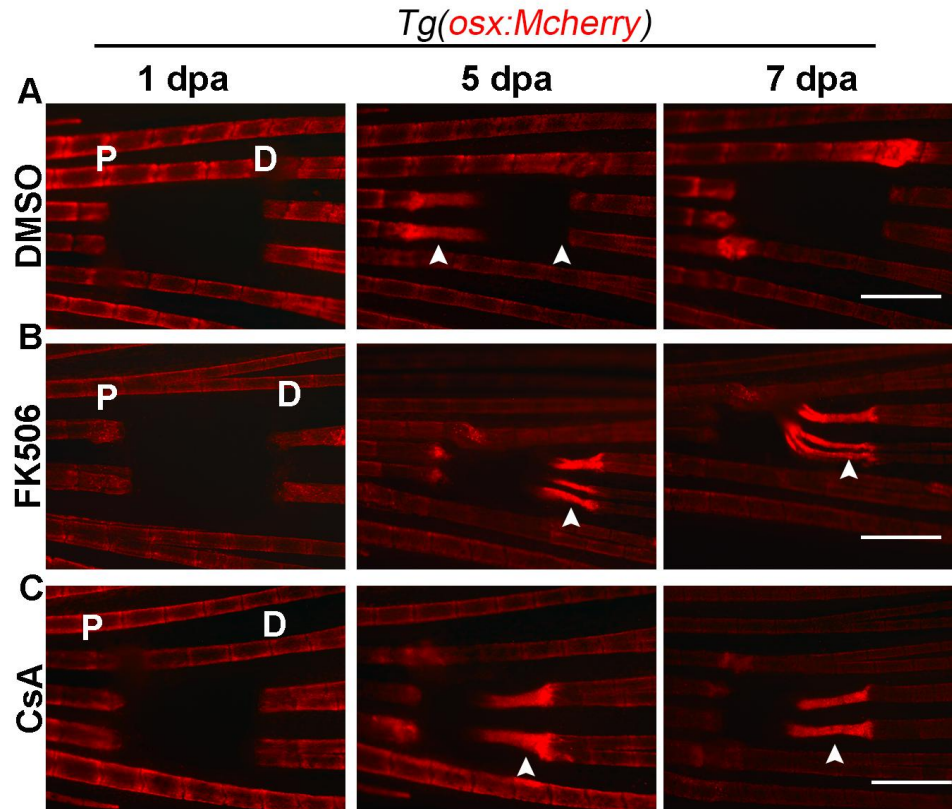

**Fig. S2. Osteoblasts of the PCE were induced by calcineurin inhibition.** (A-C) Transgenic *Tg(osx:mCherry)* fins were amputated and osteoblasts of PCE (labeled by mCherry, arrowheads) were induced by FK506 (n= 4/10) and CsA (n= 5/10) compared with DMSO (n= 8/10) . Scale bars: 500  $\mu$ M.

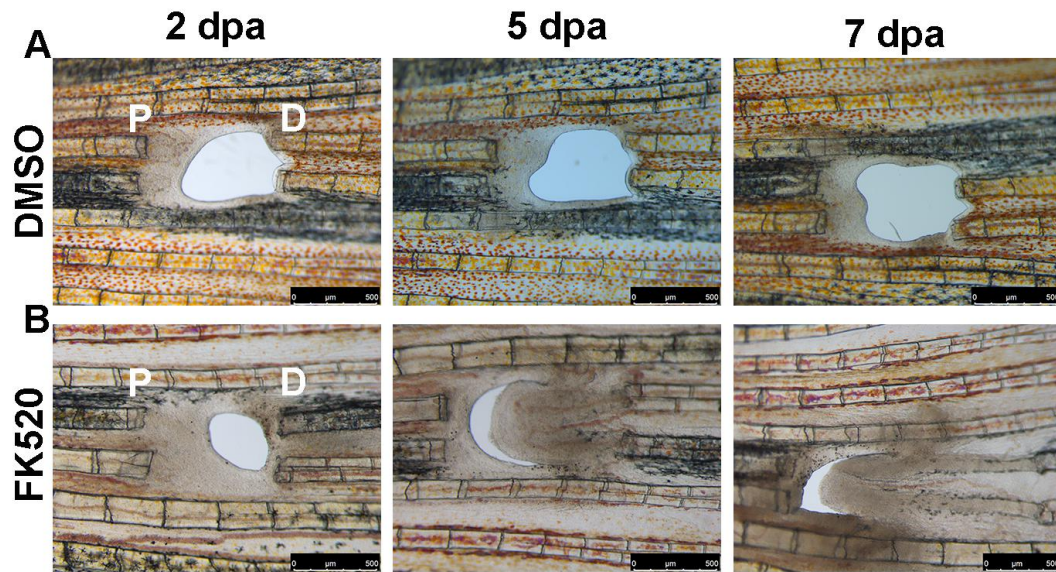

**Fig. S3. PCE regeneration was induced by the FK520 treatment.** (A, B) FK520 (2 μm), a FK506 derivative, induced the formation of PCE regeneration (5/7) compared with DMSO (8/10). Scale bars: 500 μM.

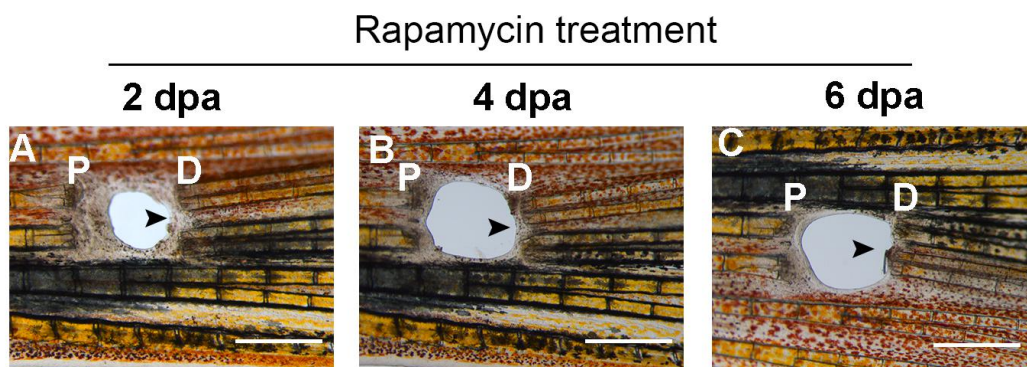

**Fig. S4. FK506-induced PCE regeneration was not due to immunosuppression.** (A-C) PCE blastemas failed to form at 5 dpa after rapamycin treatment (n = 7/7). Scale bars: 500 μM.

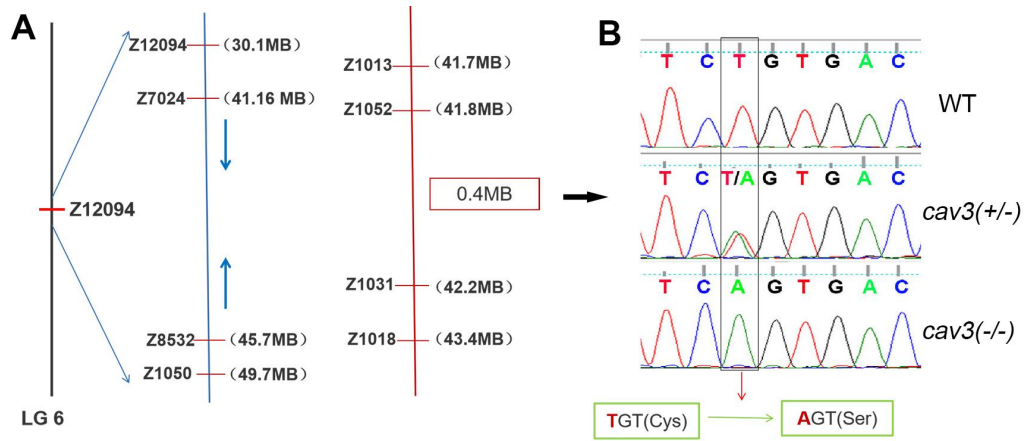

**Fig. S5. Identification of the *cav3<sup>cq105</sup>* mutant.**

(A) Gene mapping with the SSLP marker. (B) Single base with the nonsense mutation in the *cav3<sup>cq105</sup>* mutant.

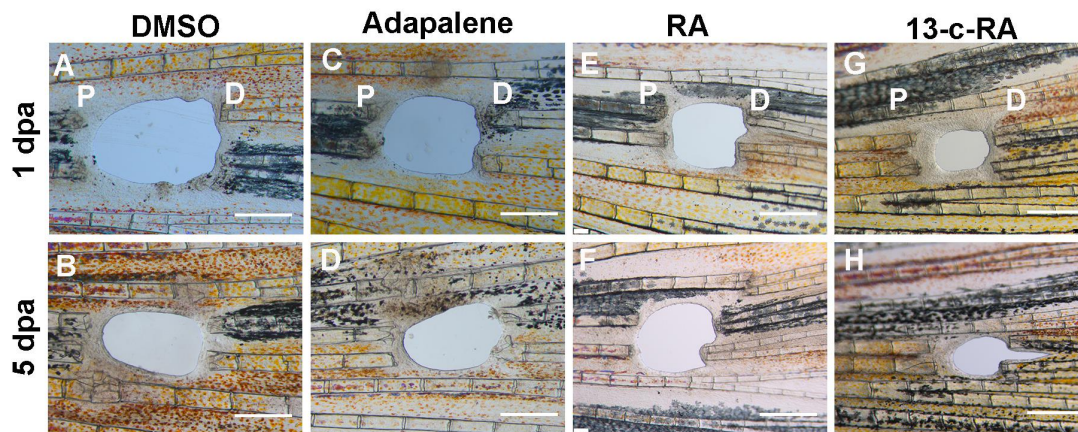

**Fig. S6. Wnt, Fgf and notch signaling were unable to induce regeneration of the PCE.** (A, B) Controls with DMSO treatment (n =6/7). (C-H) XAV939 (Wnt inhibitor) (n =7/7), BML284 (Wnt accelerator) (n=7/7), and FK506 after XAV939 treatment (n =6/6). (I-N) Overexpression of *fgf20a* (n =11/12) and *dnfgfr* (n =12/14) by heat-shock of the transgenic fish *Tg(hsp70l:fgf20a-mCherry)* and *Tg(hsp70l:dnfgfr-GFP)* for separately activating and suppressing Fgf signaling and BGJ398 (Fgf inhibitor)

treatment (n=7/8). (O, P) NICD (a notch accelerator) treatment from 1 to 5 dpa (n=7/7). Scale bars: 500  $\mu$ M.

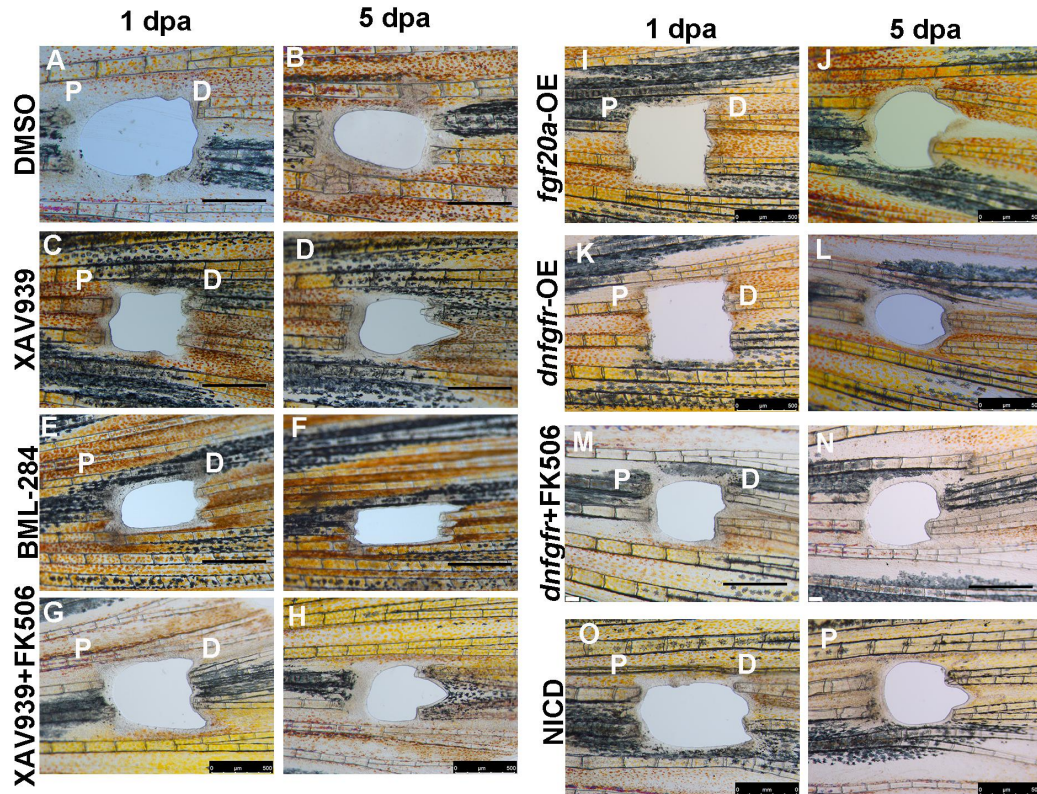

**Fig. S7. RA signaling was unable to induce PCE regeneration.**

(A–H) Adapalene, RA, and 13-c-RA (RA inhibitor) treatment failed to induce PCE regeneration (n = 8/8). Scale bars: 500  $\mu$ M.

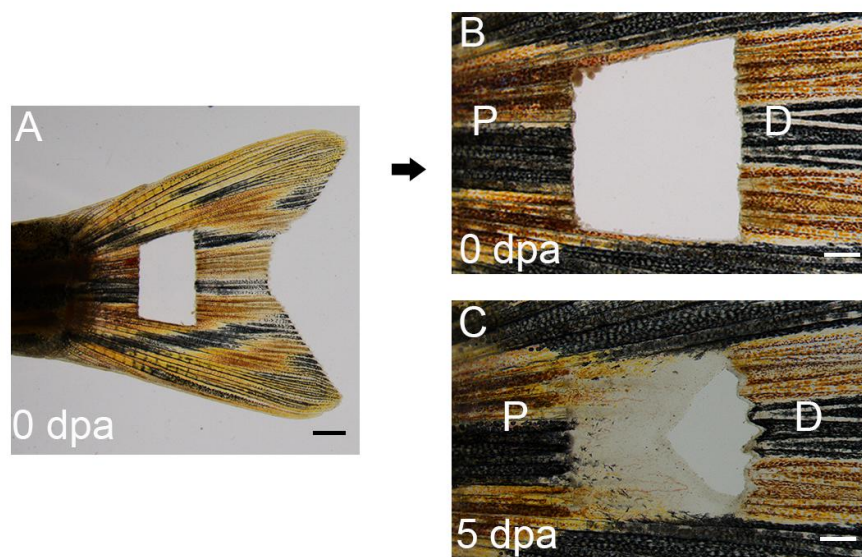

**Fig. S8. The regenerative direction was from the ACE to the PCE in the largest holes of zebrafish caudal fins.**

(A-C) The largest holes (2.2 x 2 mm) in zebrafish caudal fins were regenerated and the regenerative direction was still from the ACE to the PCE (n = 6/7). Scale bars: 1 mm (A), 500  $\mu$ M (B and C).

**Tabel S1. FPKM values of ACE and PCE transcriptome sequencing**

| Gene    | control | ACE_24h | PCE_24h | ACE_48h | PCE_48h | ACE_72h | PCE_72h |
|---------|---------|---------|---------|---------|---------|---------|---------|
| fkbp9   | 20.19   | 36.27   | 21.05   | 112.07  | 20.26   | 182.46  | 40.63   |
| fkbp10b | 10.64   | 16.99   | 6.20    | 27.74   | 6.29    | 54.74   | 18.87   |
| fkbp7   | 29.56   | 38.99   | 8.55    | 80.88   | 30.58   | 172.47  | 26.82   |
| fkbp14  | 5.86    | 8.43    | 4.91    | 27.51   | 6.23    | 40.25   | 7.44    |

**Table S2. List of primers used for qRT-PCR and probes.**

| Primers for qRT-PCR |                            |
|---------------------|----------------------------|
| <i>fgf20a</i>       | FP: AAAAGCTGTCAGCCGAGTGT   |
|                     | RP: TGGACGTCCCATCTTTGTTG   |
| <i>lef1</i>         | FP: AATGATCCCGTTCAAAGACG   |
|                     | RP: CGCTAAGTCTCCCTCCTCCT   |
| <i>msxb</i>         | FP: ACACTTTGTGCGAGCGTTTCGG |
|                     | RP: TCTTGTGCTTGCGTAAGGTGC  |
| <i>osn</i>          | FP: GTGGAGGATGTTATTGCTGAG  |
|                     | RP: GGGGCAGGTCAAAGGGTC     |
| <i>raldh2</i>       | FP: AACCACTGAACACGGACCTC   |
|                     | RP: CTCCAGTTTGGCTCCTTCAG   |
| <i>wnt10a</i>       | FP: CATGAGTGCCAGCATCAGTT   |
|                     | RP: CTCTGAAACCCCTGCTGAAG   |
| <i>wnt5b</i>        | FP: TAGGATGGGGAACATCAAGG   |
|                     | RP: AGCAAGGTGGAGTGTGTGTG   |
| <i>cyp26a1</i>      | FP: GATGGGAGCTGATAATGTG    |
|                     | RP: CCTGAACCTCCTCTCTGACC   |
| <i>ppp3ca</i>       | FP: GGGCTTCTATCCTACGCCAG   |
|                     | RP: TTCAGCGACCACAGGTACAG   |
| Primers for probes  |                            |
| <i>lef1</i>         | FP: CAGTCACGACGCAGCTAGAC   |

|               |                              |
|---------------|------------------------------|
|               | RP: CTCTGGCCTGTACCTGAAGC     |
| <i>runx2b</i> | FP: ATGCGCATTCCCGTAGATCC     |
|               | RP: TCAATACGGCCTCCAAACGCC    |
| <i>msxb</i>   | FP: GAGAATGGGACATGGTCAGG     |
|               | RP: GCGGTTCCCTCAGAATAATAAC   |
| <i>raldh2</i> | FP: GGCTGATCTGGTGGAGAGAG     |
|               | RP: TGAATCCTCCGAAAGGACAC     |
| <i>and1</i>   | FP: ATGGCTCATTTGAGAGGATCTTCC |
|               | RP: TTATTTCTTTCTGTAGTCTCC    |
| <i>and2</i>   | FP: ATGGCCAGACTCATTAAGATC    |
|               | RP: TCATTTCTTGTAGCCACCCAT    |

**Movie S1. Blood flow (erythrocytes labeled by *Tg(gata1:DesRed)* ) in the lepidotrichia between two holes at 3 dpa.**
